# Supplementary material for: Development of a high-performance anion exchange membrane using poly(isatin biphenylene) with flexible heterocyclic quaternary ammonium cations for alkaline fuel cells
Source: Royal Society of Chemistry journal article supplement (doi:10.1039/c8ta11291f), 2019-01-01
Supplement: c8ta11291f1.pdf [file c8ta11291f1.pdf]

**Development of high-performance anion exchange membrane  
fuel cell using poly(isatin biphenylene) with flexible heterocycle  
quaternary ammonium cations**

Shuai Zhang<sup>a</sup>, Xiuling Zhu<sup>\*a</sup> and Cuihong Jin<sup>a</sup>

<sup>a</sup> State Key Lab of Fine Chemicals, Department of Polymer Science & Materials, Dalian

University of Technology, Dalian 116024, P R China

Corresponding authors

Tel.: + 86-411-84986095

Fax: + 86-411-84986095

E-mail address: zhuxl@dlut.edu.cn

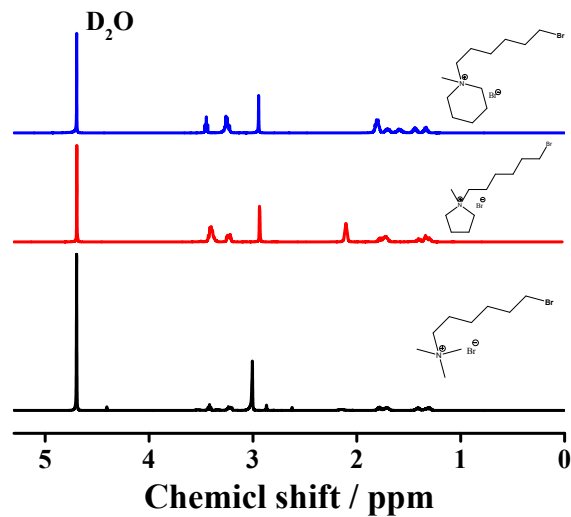

**Fig.S1**  $^1\text{H-NMR}$  spectra of QA, Pyr and Pip (Br<sup>-</sup> form)

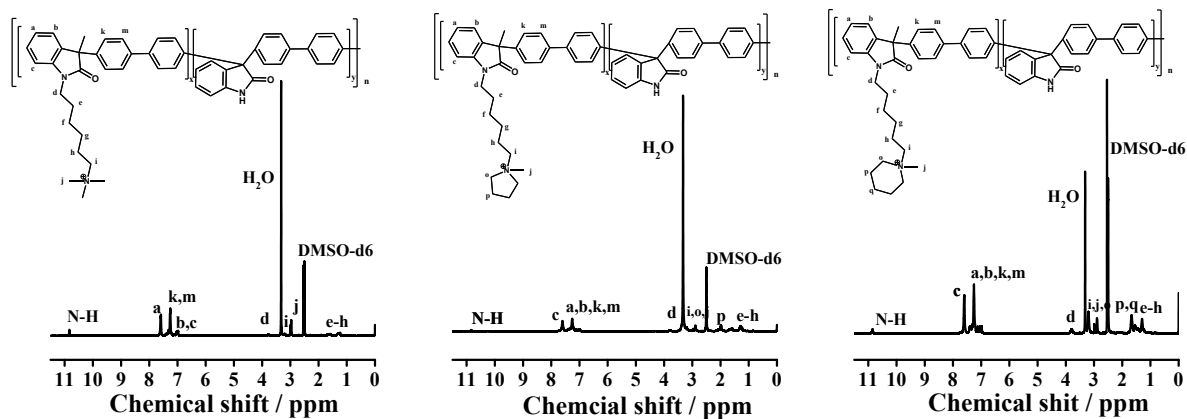

**Fig.S2**  $^1\text{H-NMR}$  spectra of QAPIB, PyrPIB and PipPIB (Br<sup>-</sup> form)

Peaks a, b, c, k and m correspond to the protons on aromatic ring. Peaks d correspond to the  $-\text{CH}_2-$  which is close to the N-H of isatin. Therefore, the degree of grafting for F-PIBs was calculated by using equation:

$$\frac{\text{Area}_d}{\text{Area}_{(a+b+c+k+m)}} / 0.1667 \dots\dots\dots (1)$$

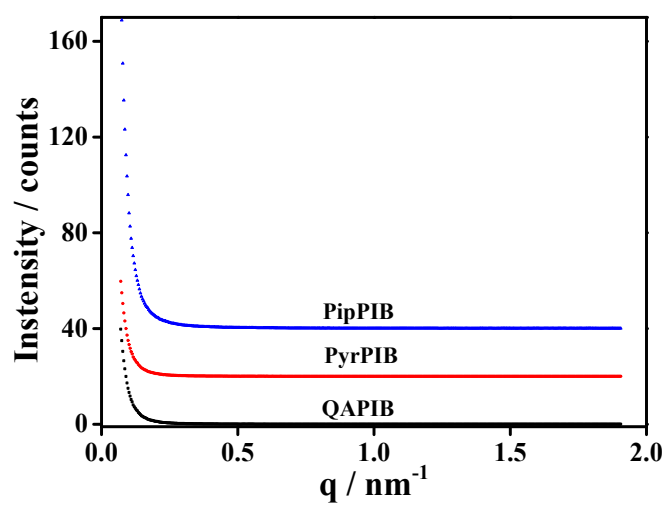

Fig.S3 SAXS profiles of the PIB-based AEMs

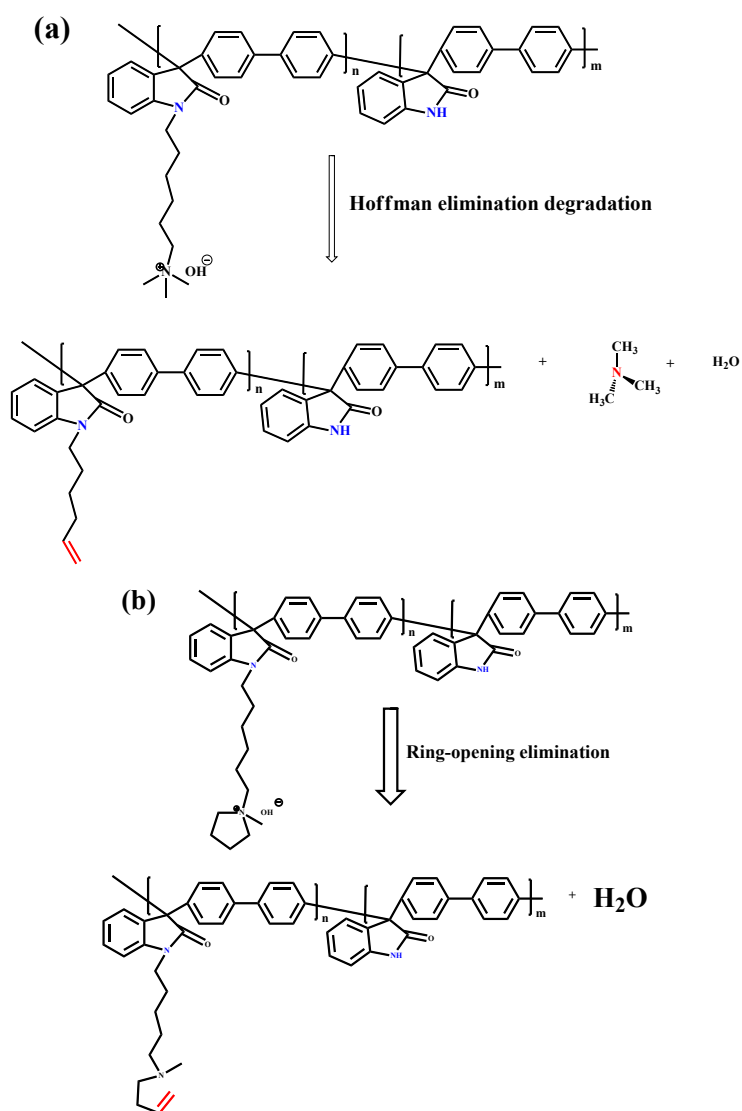

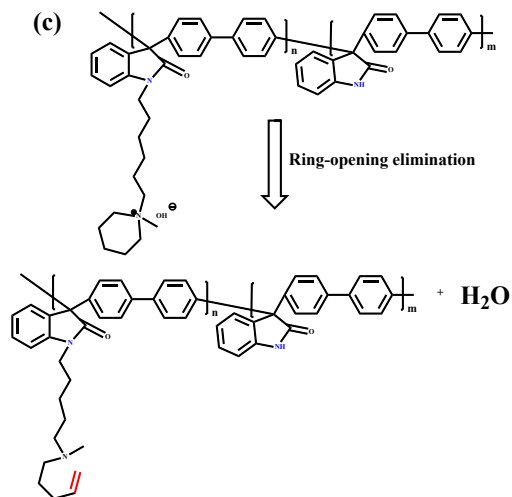

**Fig.S4** Proposed degradation mechanism of PIB-based AEM (a) QAPIB, (b) PyrPIB and (c) PipPIB

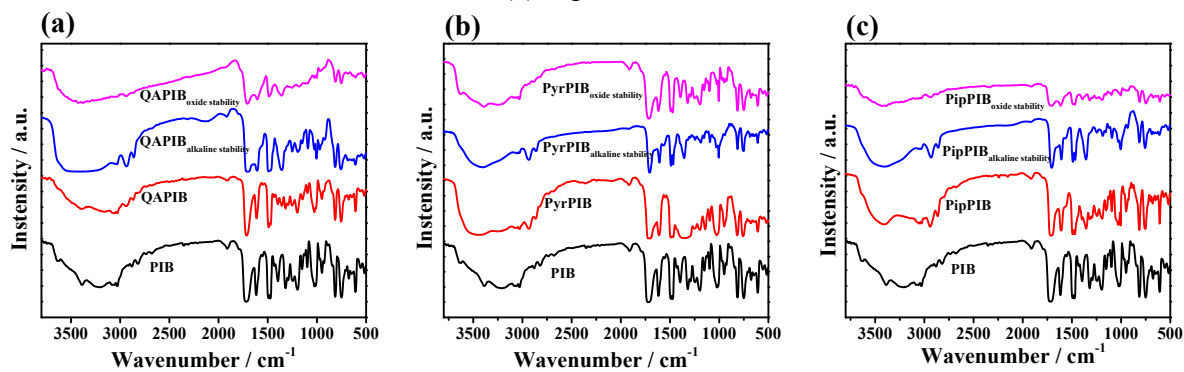

**Fig.S5** the FT-IR spectra of QAPIB, PyrPIB and PipPIB after alkaline treatment and Fenton's test

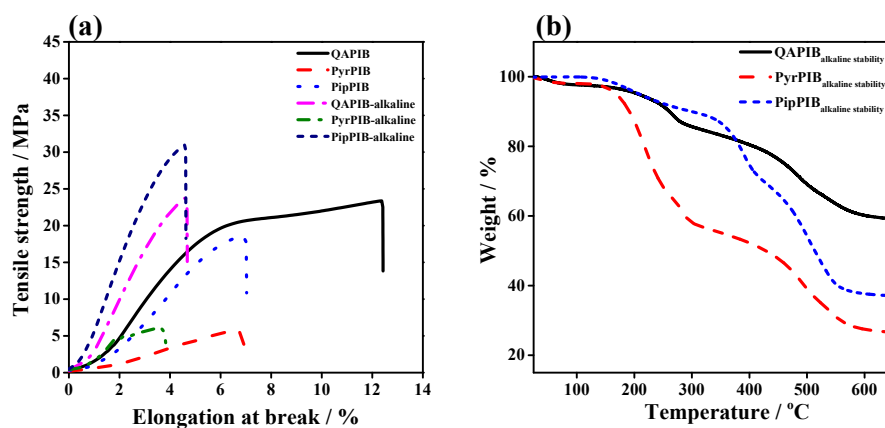

**Fig.S6** the strain-stress curves of wet membranes (a) and TGA curves of AEMs after alkaline stability test (b).

**Table S1** The mechanical properties of wet membranes before and after alkaline test

| Samples         | Tensile strength (MPa) | Young's (MPa) | Modulus | Elongation at break (%) |
|-----------------|------------------------|---------------|---------|-------------------------|
| QAPIB           | 23.36                  | 497.42        |         | 12.37                   |
| PyrPIB          | 5.63                   | 114.37        |         | 6.89                    |
| PipPIB          | 18.45                  | 419.34        |         | 7.0                     |
| QAPIB-alkaline  | 23.81                  | 718.33        |         | 4.61                    |
| PyrPIB-alkaline | 6.06                   | 423.18        |         | 3.76                    |
| PipPIB-alkaline | 31.02                  | 973.12        |         | 4.59                    |

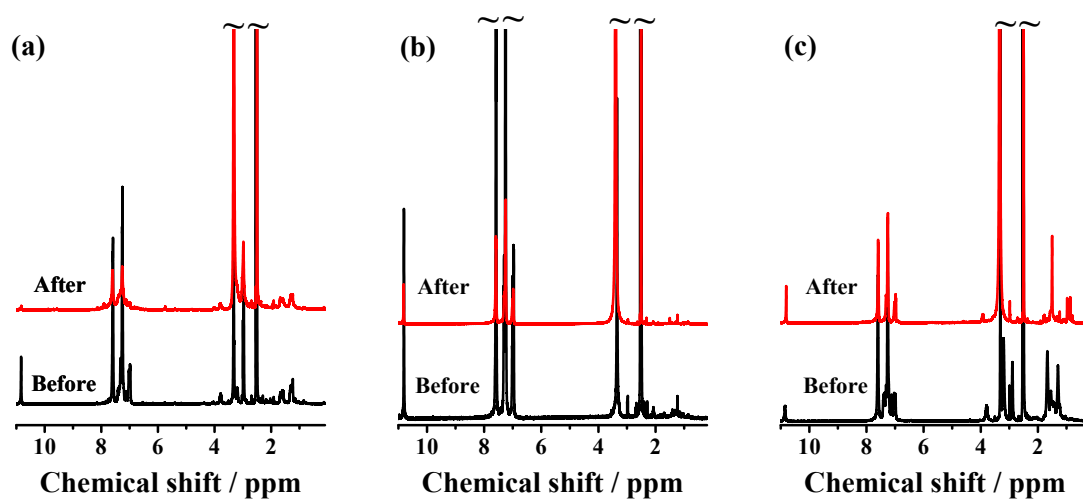

**Fig.S7** the <sup>1</sup>H-NMR spectra of (a) QAPIB, (b) PyrPIB and (c) PipPIB after oxidative stability test

**Table S2** IEC, water uptake, swelling ratio and hydroxide conductivity of the AEMs and reported AEMs

| Membranes      | IEC ( $\text{mmol}\cdot\text{g}^{-1}$ ) | WU (wt%)          | SW (%)            | $\sigma_{\text{OH}^-}$ ( $\text{mS}\cdot\text{cm}^{-1}$ ) | Reference |
|----------------|-----------------------------------------|-------------------|-------------------|-----------------------------------------------------------|-----------|
| PTPipQ6        | 2.08                                    | 44 <sup>a</sup>   | -                 | 47.9 <sup>a</sup>                                         | 1         |
| PES-MPRD       | 1.42                                    | 36.5 <sup>b</sup> | 17.2 <sup>b</sup> | 60.4 (Br <sup>-</sup> 80 °C)                              | 2         |
| PPO-7Q-1.8     | 1.8                                     | 42 <sup>a</sup>   | -                 | 33 <sup>a</sup>                                           | 3         |
| PPO-5Q1        | 1.5                                     | 39 <sup>a</sup>   | -                 | 14 <sup>a</sup>                                           | 4         |
| PES-6-QA       | 1.48                                    | 77.5 <sup>b</sup> | 22 <sup>b</sup>   | 30 <sup>b</sup>                                           | 5         |
| D-SC-paAE100%  | 2.41                                    | 30.4 <sup>b</sup> | 0 <sup>b</sup>    | 58 <sup>b</sup>                                           | 6         |
| ABA-TQA-44     | 1.93                                    | 58.6 <sup>a</sup> | 18.9 <sup>a</sup> | 58.7 <sup>a</sup>                                         | 7         |
| 8C-SfPAES-ImOH | 1.49                                    | 70 <sup>b</sup>   | 28 <sup>a</sup>   | 38 <sup>a</sup>                                           | 8         |
| QAPIB          | 1.23                                    | 32 <sup>b</sup>   | 9.5 <sup>b</sup>  | 33.5 <sup>b</sup>                                         | This work |
| PyrPIB         | 1.11                                    | 40 <sup>b</sup>   | 8.2 <sup>b</sup>  | 25.8 <sup>b</sup>                                         | This work |
| PipPIB         | 1.26                                    | 15 <sup>b</sup>   | 5.1 <sup>b</sup>  | 24.6 <sup>b</sup>                                         | This work |

<sup>a</sup> Measured at 20 °C

<sup>b</sup> Measured at 30 °C

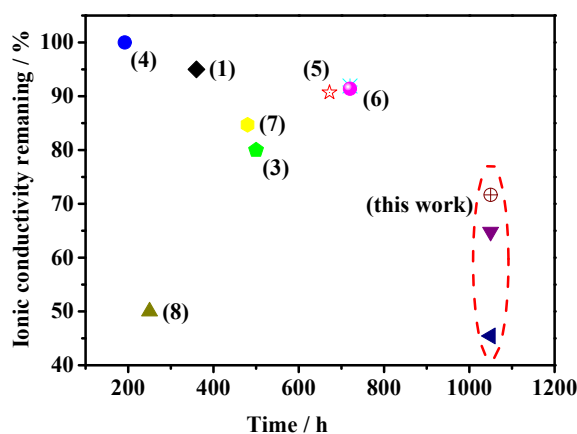

**Fig.S8** Hydroxide conductivity of the F-PIBs membranes compared with that of other AEMs with long side chain. (The number in brackets is represented for reference)

### Reference

1. J. S. Olsson, T. H. Pham and P. Jannasch, *Adv. Funct. Mater.*, 2018, **28**, 1702758.
2. F. H. Liu, C. X. Lin, E. N. Hu, Q. Yang, Q. G. Zhang, A. M. Zhu and Q. L. Liu, *J. Membrane Sci.*, 2018, **564**, 298-307.

3. H. S. Dang, E. A. Weiber and P. Jannasch, *J. Mater. Chem. A*, 2015, **3**, 5280-5284.
4. H. S. Dang and P. Jannasch, *Macromolecules*, 2015, **48**, 5742-5751.
5. C. X. Lin, X. L. Huang, D. Guo, Q. G. Zhang, A. M. Zhu, M. L. Ye and Q. L. Liu, *Journal of Materials Chemistry A*, 2016, **4**, 13938-13948.
6. J. Ran, L. Ding, C. Chu, X. Liang, T. Pan, D. Yu and T. Xu, *J. Mater. Chem. A*, 2018, **6**, 17101-17110.
7. C. X. Lin, H. Y. Wu, L. Li, X. Q. Wang, Q. G. Zhang, A. M. Zhu and Q. L. Liu, *ACS Appl. Mater. Inter.*, 2018, **10**, 18327-18337.
8. X. Yan, B. Zhao, J. Liu, X. Zhang and G. He, *Journal of Membrane Science*, 2018, **564**, 436-443.
